# Supplementary material
Source: PubMed Central journal article supplement (PMC7261131)
Supplement: pnas.2000712117.sapp.pdf [file pnas.2000712117.sapp.pdf]

# PNAS

[www.pnas.org](http://www.pnas.org)

Supplementary Information for

Biased signaling by endogenous opioid peptides

Ivone Gomes<sup>1</sup>, Salvador Sierra<sup>\*2</sup>, Lindsay Lueptow<sup>\*3</sup>, Achla Gupta<sup>\*1</sup>, Shawn Gouty<sup>5</sup>, Elyssa B. Margolis<sup>4</sup>, Brian M. Cox<sup>5</sup>, Lakshmi A. Devi<sup>1</sup>

Corresponding Author:  
Lakshmi A. Devi

E-mail: [Lakshmi.devi@mssm.edu](mailto:Lakshmi.devi@mssm.edu)

**This PDF file includes:**

Figures S1 to S3  
Tables S1 to S8

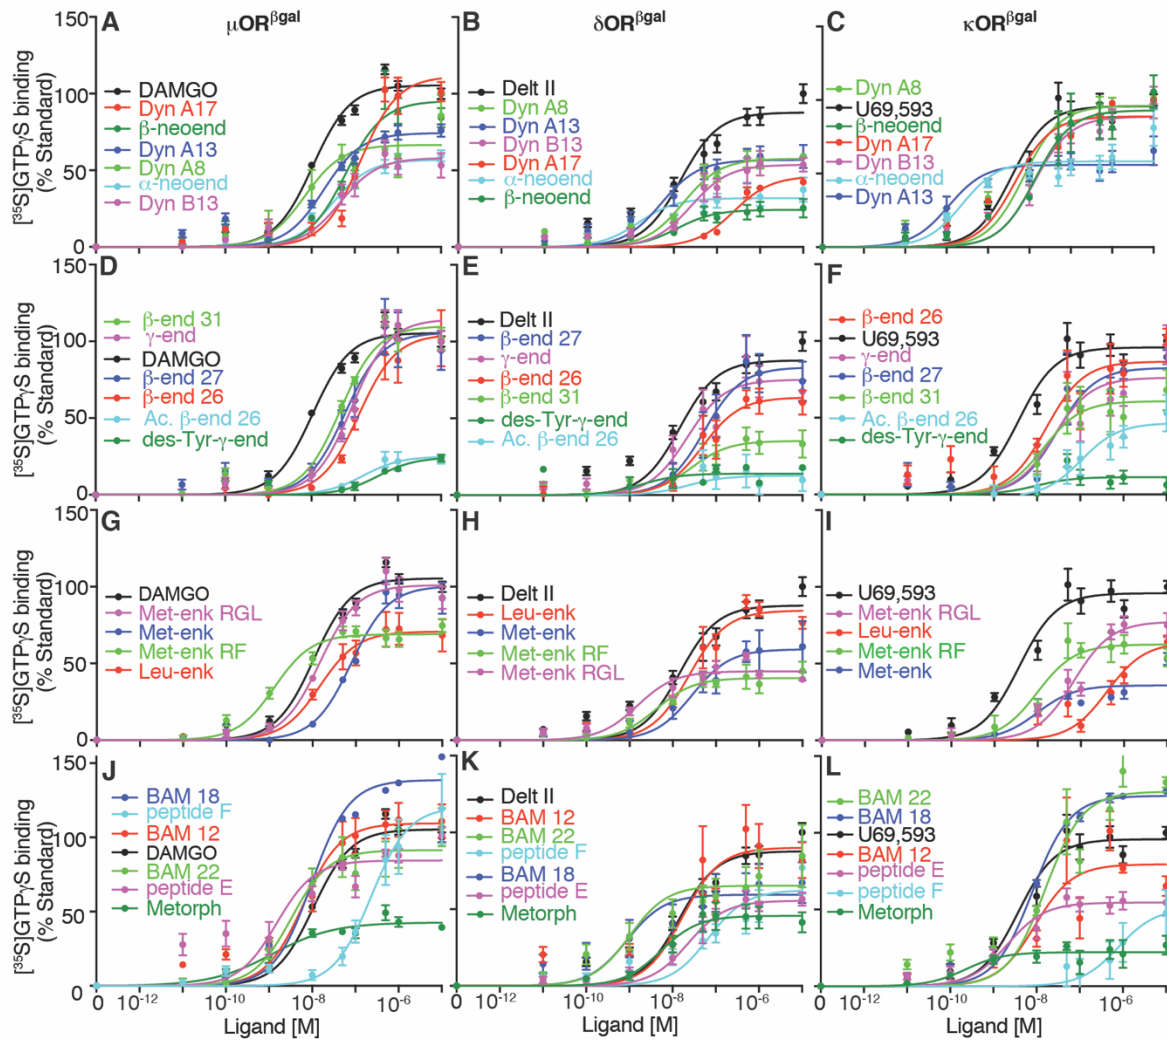

**Fig.S1** [<sup>35</sup>S]GTP<sub>γ</sub>S binding at  $\mu$ OR,  $\delta$ OR and  $\kappa$ OR by endogenous opioid peptides.

[<sup>35</sup>S]GTP<sub>γ</sub>S binding by opioid peptides generated from pro-dynorphin (A-C), POMC (D-F) or pro-enkephalin (G-L) processing. Membranes (20  $\mu$ g) from cells expressing either  $\mu^{\beta gal}$ OR,  $\delta^{\beta gal}$ OR or  $\kappa^{\beta gal}$ OR were treated without or with different concentrations of peptides ( $10^{-12}$  -  $10^{-5}$  M) as described in Methods. DAMGO was used as standard for  $\mu$ OR, deltorphin II for  $\delta$ OR and U69,593 for  $\kappa$ OR. Data are mean  $\pm$  SE from 3-6 independent experiments.

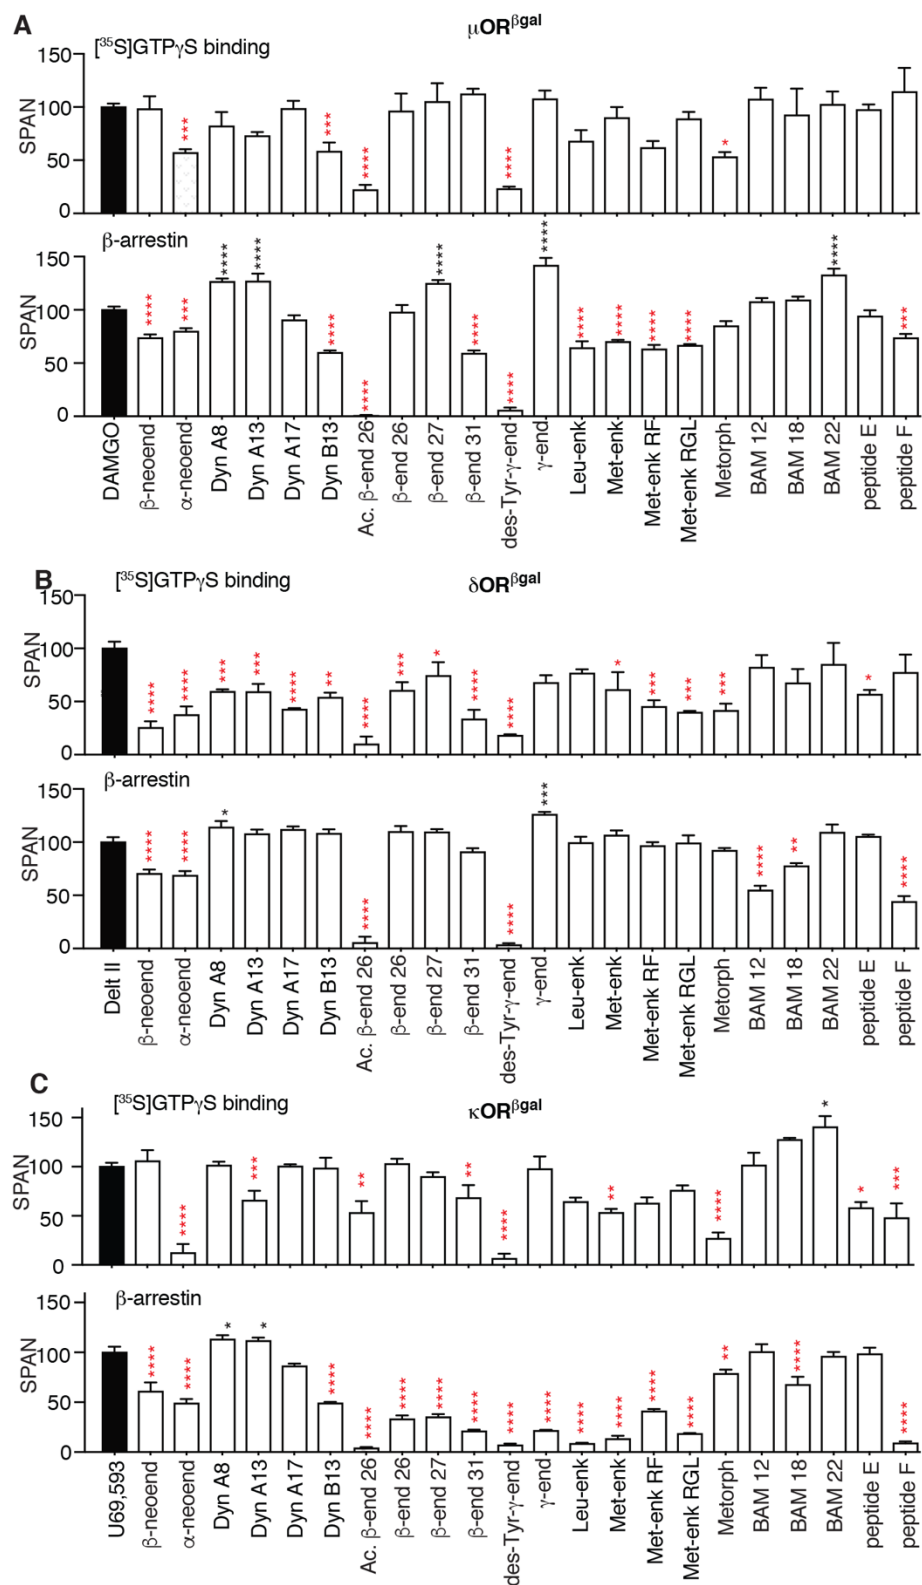

**Fig. S2. Identification of opioid peptides that induce a maximal response.** SPAN values (i.e.  $E_{\text{max}}$ ) obtained from fitting dose response curves in Figs S1 and S3 to the four parameter logistic equation in Prism 7.0 were analyzed using one-Way ANOVA followed by Dunnett's posthoc test to identify opioid peptides that induced maximal response at  $[^{35}\text{S}]\text{GTP}\gamma\text{S}$  binding or  $\beta$ -arrestin recruitment at  $\mu\text{OR}$  (**A**),  $\delta\text{OR}$  (**B**) or  $\kappa\text{OR}$  (**C**). \* $p > 0.05$ ; \*\* $p > 0.01$ ; \*\*\* $p > 0.001$ , \*\*\*\* $p > 0.0001$ . \* in black indicates better than that of standard. \* in red indicates lower than that of standard.

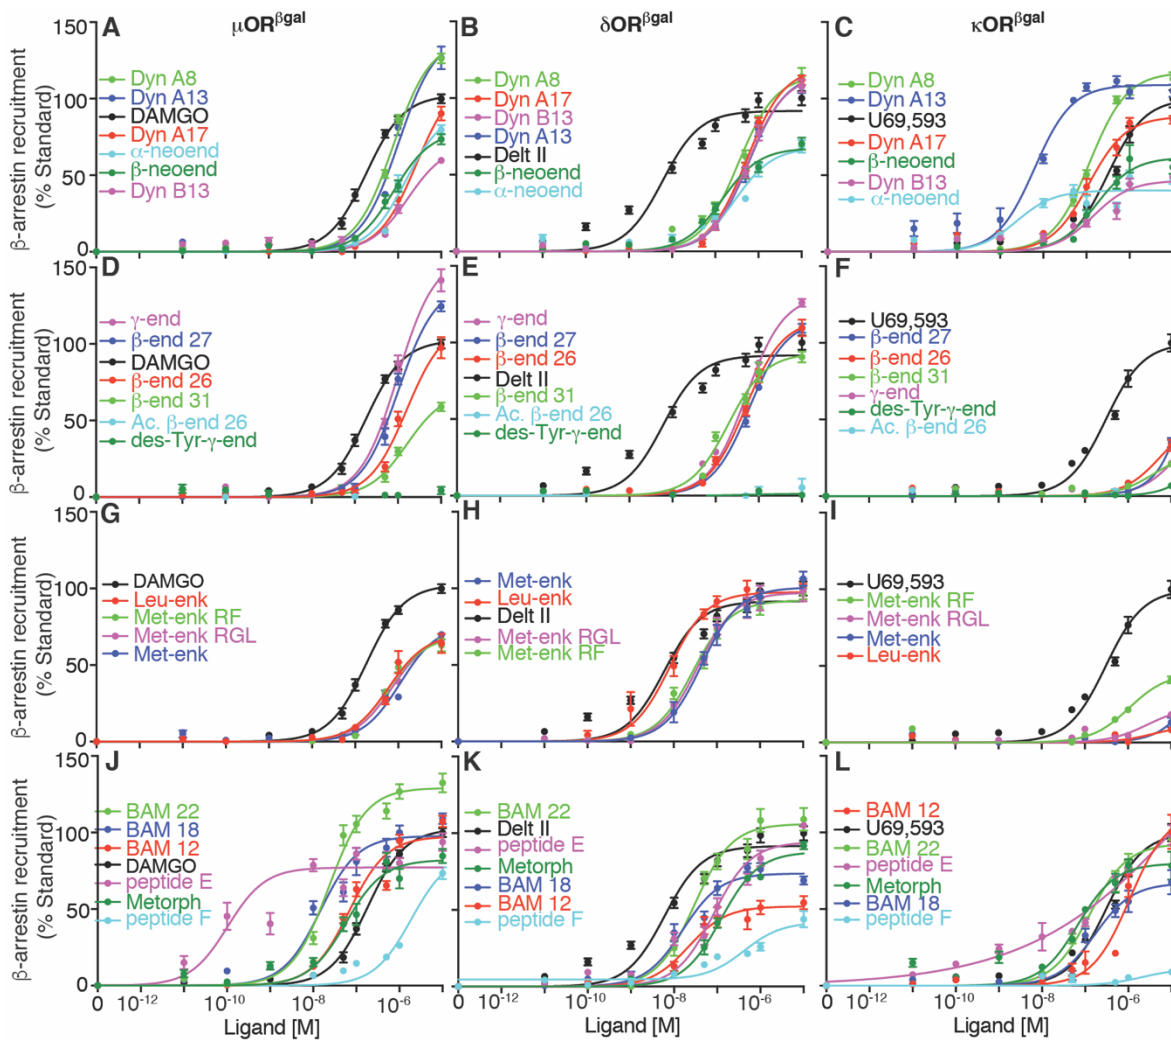

**Fig.S3  $\beta$ -arrestin recruitment at  $\mu$ OR,  $\delta$ OR and  $\kappa$ OR by endogenous opioid peptides.**  $\beta$ -arrestin recruitment by opioid peptides generated from pro-dynorphin (A-C), POMC (D-F) or pro-enkephalin (G-L) processing. Cells (5,000 cells/well) expressing either  $\mu^{\beta gal}$ OR,  $\delta^{\beta gal}$ OR or  $\kappa^{\beta gal}$ OR were treated without or with different concentrations of peptides ( $10^{-12}$  -  $10^{-5}$  M) as described in Methods. DAMGO was used as standard for  $\mu$ OR, deltorphin II for  $\delta$ OR and U69,593 for  $\kappa$ OR. Data are mean  $\pm$  SE from 3 independent experiments.

Supplemental Table 1. Displacement binding parameters by endogenous opioid peptides at  $\mu$ OR,  $\delta$ OR or  $\kappa$ OR

|                                              | $\mu$ OR                   |                |                           | $\delta$ OR                |                |                           | $\kappa$ OR                |                |                           |
|----------------------------------------------|----------------------------|----------------|---------------------------|----------------------------|----------------|---------------------------|----------------------------|----------------|---------------------------|
|                                              | IC <sub>50</sub> [M]       | n <sub>H</sub> | % displaced at 10 $\mu$ M | IC <sub>50</sub> [M]       | n <sub>H</sub> | % displaced at 10 $\mu$ M | IC <sub>50</sub> [M]       | n <sub>H</sub> | % displaced at 10 $\mu$ M |
| <b>Standards</b>                             |                            |                |                           |                            |                |                           |                            |                |                           |
| DAMGO                                        | 8.4±1.4E-11;<br>1.4±1.2E-7 | 36.8%          | 100±3                     | 3.4±2.0E-5                 | n.a.           | 28±1                      | 3.5±1.6E-7                 | n.a.           | 36±6                      |
| DeltI                                        | 1.3±1.5E-6                 | n.a.           | 27±6                      | 4.4±1.4E-10;<br>5.7±1.4E-7 | 50.4%          | 100±2                     | 4.6±1.7E-8                 | n.a.           | 35±4                      |
| U69,593                                      | 7.9±1.6E-7                 | n.a.           | 19±4                      | 3.5±3.0E-7                 | n.a.           | 22±8                      | 8.9±2.1E-11;<br>5.7±1.5E-8 | 34.1%          | 100±2                     |
| <b>Pro-dynorphin derived peptides</b>        |                            |                |                           |                            |                |                           |                            |                |                           |
| $\beta$ -neoend                              | 3.0±2.1E-10;<br>6.6±1.2E-7 | 19.3%          | 89±4                      | 1.0±1.5E-9;<br>3.3±1.4E-7  | 38.1%          | 77±3                      | 1.8±1.3E-9;<br>1.3±1.5E-6  | 52.1%          | 100±2                     |
| $\alpha$ -neoend                             | 2.2±1.7E-11;<br>1.6±1.2E-7 | 28.8%          | 73±4                      | 5.0±2.1E-11;<br>2.4±1.3E-8 | 27.6%          | 91±1                      | 2.2±1.6E-10;<br>5.5±1.3E-8 | 35.7%          | 95±2                      |
| Dyn A8                                       | 1.1±1.0E-11;<br>1.3±1.2E-7 | 24.4%          | 56±4                      | 1.5±1.6E-10;<br>3.1±1.3E-7 | 31.4%          | 82±2                      | 7.0±1.5E-11;<br>3.6±1.3E-7 | 38.7%          | 95±1                      |
| Dyn A13                                      | 8.0±1.4E-11;<br>9.6±1.4E-8 | 49.2%          | 69±4                      | 7.1±1.4E-10;<br>1.2±1.4E-6 | 45.8%          | 87±2                      | 3.6±2.8E-11;<br>5.4±1.0E-8 | 14.6%          | 84±2                      |
| Dyn A17                                      | 6.2±2.1E-10;<br>4.0±1.4E-7 | 28.2%          | 51±3                      | 7.9±1.4E-11;<br>3.7±1.2E-7 | 30.4%          | 77±2                      | 5.9±1.6E-11;<br>2.7±1.5E-7 | 42.5%          | 98±2                      |
| Dyn B13                                      | 3.4±1.9E-10;<br>2.0±1.4E-7 | 32.3%          | 58±3                      | 4.8±1.4E-9;<br>8.3±1.4E-7  | 47.2%          | 86±2                      | 1.9±1.4E-11;<br>3.1±1.0E-7 | 31.7%          | 96±1                      |
| <b>Pro-opiomelanocortin derived peptides</b> |                            |                |                           |                            |                |                           |                            |                |                           |
| Ac. $\beta$ -end 26                          | 2.1±1.3E-7                 | n.a.           | 31±3                      | 4.4±1.5E-11;<br>5.8±1.3E-7 | 37.3%          | 64±1                      | 1.1±2.3E-10;<br>4.7±1.0E-7 | 19.1%          | 51±2                      |
| $\beta$ -end 26                              | 4.7±1.6E-10;<br>1.7±1.2E-6 | 23.9%          | 100±1                     | 7.2±2.0E-11;<br>3.8±1.2E-8 | 23.5%          | 83±2                      | 1.2±1.4E-8;<br>5.3±2.4E-6  | 39.3%          | 91±3                      |
| $\beta$ -end 27                              | 1.1±2.0E-10;<br>7.0±1.2E-7 | 19.4%          | 100±1                     | 1.0±1.8E-10;<br>1.3±1.3E-7 | 29.3%          | 87±1                      | 7.0±3.8E-11;<br>2.0±1.3E-7 | 17.1%          | 38±2                      |
| $\beta$ -end 31                              | 2.8±1.7E-11;<br>3.6±1.1E-7 | 16.4%          | 100±1                     | 9.2±1.6E-11;<br>7.4±1.2E-8 | 29.5%          | 88±2                      | 9.6±2.0E-11;<br>1.5±1.0E-7 | 23.0%          | 70±2                      |
| Des-Tyr- $\gamma$ -end                       | 4.5±1.3E-7                 | n.a.           | 30±2                      | 3.0±1.5E-8                 | n.a.           | 59±2                      | 3.0±1.6E-11;<br>7.6±1.4E-7 | 38.3%          | 58±2                      |
| $\gamma$ -end                                | 4.9±1.2E-10;<br>1.6±1.2E-6 | 48.4%          | 82±1                      | 4.3±1.5E-11;<br>1.3±1.4E-7 | 42.1%          | 77±2                      | 1.9±1.5E-10;<br>6.2±1.3E-8 | 44.2%          | 86±2                      |
| <b>Pro-enkephalin derived peptides</b>       |                            |                |                           |                            |                |                           |                            |                |                           |
| Leu-enk                                      | 3.1±1.8E-10;<br>1.3±1.4E-7 | 36.4%          | 77±4                      | 1.3±1.9E-9;<br>4.7±1.4E-7  | 30.8%          | 57±2                      | 1.0±2.3E-10;<br>7.1±1.5E-7 | 30.3%          | 53±3                      |
| Met-enk                                      | 1.6±3.0E-10;<br>8.8±1.3E-8 | 21.8%          | 77±3                      | 2.1±1.5E-10;<br>9.8±1.2E-8 | 31.6%          | 56±2                      | 2.2±1.5E-10;<br>6.7±1.3E-7 | 37.7%          | 65±2                      |
| Met-enk RF                                   | 1.3±1.4E-9;<br>7.3±1.8E-7  | 58.6%          | 95±1                      | 2.1±2.3E-10;<br>6.9±1.2E-8 | 21.8%          | 74±1                      | 4.5±1.9E-11;<br>1.1±1.4E-7 | 38.3%          | 62±1                      |
| Met-enk RGL                                  | 2.4±1.9E-9;<br>2.1±2.9E-6  | 52.8%          | 84±5                      | 5.7±1.5E-10;<br>3.1±1.3E-8 | 39.3%          | 72±1                      | 1.7±1.9E-11;<br>2.1±1.5E-7 | 28.0%          | 61±4                      |
| Metorphamide                                 | 2.5±1.5E-10;<br>4.6±2.0E-7 | 59.3%          | 85±3                      | 8.9±1.1E-10;<br>6.8±1.3E-7 | 37.3%          | 81±2                      | 1.1±1.3E-10;<br>3.0±1.2E-7 | 34.6%          | 78±1                      |
| BAM 12                                       | 6.3±2.3E-11;<br>6.1±2.0E-8 | 48.1%          | 83±8                      | 6.8±1.0E-11;<br>8.9±1.0E-8 | 28.9%          | 81±3                      | 8.1±1.6E-10;<br>4.8±1.4E-7 | 37.9%          | 85±2                      |
| BAM 18                                       | 9.2±1.7E-11;<br>2.1±1.4E-7 | 37.2%          | 79±5                      | 9.1±1.3E-11;<br>2.4±1.4E-7 | 49.1%          | 71±2                      | 6.2±1.4E-10;<br>7.7±1.5E-7 | 45.9%          | 100±2                     |
| BAM 22                                       | 2.1±1.6E-10;<br>1.4±1.8E-7 | 55.9%          | 93±4                      | 1.2±1.3E-9;<br>3.0±1.4E-6  | 43.4%          | 94±1                      | 4.1±1.4E-11;<br>9.4±1.2E-8 | 40.4%          | 100±1                     |
| Peptide E                                    | 9.3±1.3E-10;<br>8.8±1.4E-7 | 53.0%          | 97±2                      | 3.6±1.4E-10;<br>1.9±1.3E-7 | 41.8%          | 53±1                      | 5.6±2.1E-11;<br>5.4±1.2E-8 | 21.0%          | 97±2                      |
| Peptide F                                    | 8.0±1.8E-10;<br>6.6±1.6E-7 | 43.1%          | 92±2                      | 2.2±1.9E-10;<br>9.0±1.6E-7 | 38.1%          | 54±4                      | 8.8±1.5E-10;<br>3.2±1.3E-7 | 32.2%          | 96±2                      |

Displacement binding assays were carried out with [<sup>3</sup>H] diprenorphine (3 nM) using membranes (20  $\mu$ g) expressing either  $\mu^{igal}$ OR,  $\delta^{igal}$ OR or  $\kappa^{igal}$ OR and without or with different concentrations (10<sup>-12</sup> - 10<sup>-5</sup> M) of opioid peptides in 50 mM Tris-Cl buffer containing 100 mM NaCl, 10 mM MgCl<sub>2</sub>, 0.2 mM EGTA and protease inhibitor cocktail as described in Methods. Data are mean  $\pm$  SE (n=3).  $\beta$ -neoend,  $\beta$ -neoendorphin;  $\alpha$ -neoend,  $\alpha$ -neoendorphin; Ac., Acetyl; BAM, Bovine adrenal medulla; Dyn, Dynorphin; end, endorphin; enk, enkephalin; n<sub>H</sub>, % receptors in high affinity state; n.a., not applicable.

**Supplemental Table 2. Four parameter logistic analysis for [<sup>35</sup>S]GTP<sub>γ</sub>S binding and β-arrestin recruitment by endogenous opioid peptides at μOR**

| Ligand                                       | Sequence                           | [ <sup>35</sup> S]GTP <sub>γ</sub> S binding |                           |            | β-arrestin recruitment |                           |            |
|----------------------------------------------|------------------------------------|----------------------------------------------|---------------------------|------------|------------------------|---------------------------|------------|
|                                              |                                    | EC <sub>50</sub> [M]                         | E <sub>max</sub> at 10 μM | Hill Slope | EC <sub>50</sub> [M]   | E <sub>max</sub> at 10 μM | Hill Slope |
| <b>Standard</b>                              |                                    |                                              |                           |            |                        |                           |            |
| DAMGO                                        |                                    | 9.0±1.1E-9                                   | 100±3                     | 0.87±0.08  | 1.7±1.1E-7             | 100±3                     | 1.08±0.06  |
| <b>Pro-dynorphin derived peptides</b>        |                                    |                                              |                           |            |                        |                           |            |
| β-neoend                                     | YGGFLRKYP                          | 5.1±1.2E-8                                   | 81±6                      | 1.35±0.33  | 6.6±1.1E-7             | 74±3                      | 1.14±0.12  |
| α-neoend                                     | YGGFLRKYPK                         | 3.1±1.2E-8                                   | 57±3                      | 0.69±0.08  | 9.1±1.0E-7             | 80±3                      | 2.60±0.32  |
| Dyn A8                                       | YGGFLRRI                           | 2.5±1.7E-8                                   | 82±13                     | 0.40±0.09  | 6.2±1.0E-7             | 126±3                     | 1.58±0.10  |
| Dyn A13                                      | YGGFLRRIRPKLK                      | 1.7±1.2E-8                                   | 73±4                      | 0.68±0.08  | 7.6±1.0E-7             | 127±7                     | 1.93±0.21  |
| Dyn A17                                      | YGGFLRRIRPKLKWDNQ                  | 1.1±1.1E-7                                   | 97±6                      | 2.06±0.50  | 1.3±1.1E-6             | 90±5                      | 1.82±0.18  |
| Dyn B13                                      | YGGFLRRQFKVVT                      | 4.2±1.3E-8                                   | 51±8                      | 2.03±0.93  | 1.1±1.1E-6             | 58±2                      | 1.42±0.26  |
| <b>Pro-opiomelanocortin derived peptides</b> |                                    |                                              |                           |            |                        |                           |            |
| Ac.β-end 26                                  | Ac-YGGFMTSEKSQTPLVTLFKNAIIKNA      | 1.3±1.3E-7                                   | 22±2                      | 1.77±0.76  | n.d.                   | n.d.                      | n.d.       |
| β-end 26                                     | YGGFMTSEKSQTPLVTLFKNAIIKNA         | 1.1±1.2E-7                                   | 96±17                     | 1.28±0.32  | 9.6±1.1E-7             | 98±7                      | 2.08±0.32  |
| β-end 27                                     | YGGFMTSEKSQTPLVTLFKNAIIKNAY        | 5.0±1.3E-8                                   | 90±12                     | 1.38±0.51  | 7.6±1.0E-7             | 125±3                     | 1.68±0.16  |
| β-end 31                                     | YGGFMTSEKSQTPLVTLFKNAIIKNAYKKGE    | 4.2±1.1E-8                                   | 99±7                      | 1.43±0.22  | 9.9±1.1E-7             | 59±3                      | 1.86±0.35  |
| Des-Tyr-γ-end                                | GGFMTSEKSQTPLVTL                   | 3.3±1.3E-7                                   | 23±2                      | 1.01±0.23  | n.d.                   | 4±2                       | n.d.       |
| γ-end                                        | YGGFMTSEKSQTPLVTL                  | 8.5±1.1E-8                                   | 96±6                      | 1.37±0.23  | 7.4±1.1E-7             | 142±7                     | 1.60±0.15  |
| <b>Pro-enkephalin derived peptides</b>       |                                    |                                              |                           |            |                        |                           |            |
| Leu-enk                                      | YGGFL                              | 1.2±1.4E-8                                   | 68±11                     | 0.95±0.27  | 5.2±1.1E-7             | 64±6                      | 1.69±0.33  |
| Met-enk                                      | YGGFM                              | 6.8±1.1E-8                                   | 90±10                     | 1.36±0.27  | 9.1±1.1E-7             | 70±2                      | 0.98±0.08  |
| Met-enk RF                                   | YGGFMRF                            | 1.6±1.3E-9                                   | 62±6                      | 0.95±0.22  | 4.9±1.1E-7             | 63±4                      | 1.76±0.28  |
| Met-enk RGL                                  | YGGFMRGL                           | 1.2±1.2E-8                                   | 89±7                      | 1.24±0.23  | 6.2±1.1E-7             | 66±1                      | 1.13±0.08  |
| Metorphamide                                 | YGGFMRRV-NH <sub>2</sub>           | 1.7±1.5E-9                                   | 43±2                      | 0.38±0.05  | 5.9±1.2E-8             | 85±5                      | 0.76±0.10  |
| BAM 12                                       | YGGFMRRVGRPF                       | 4.5±1.4E-9                                   | 106±11                    | 0.59±0.10  | 1.0±1.1E-7             | 107±4                     | 0.70±0.05  |
| BAM 18                                       | YGGFMRRVGRPFWWMDYQ                 | 1.1±1.7E-8                                   | 92±25                     | 0.74±0.24  | 2.0±1.2E-8             | 109±3                     | 0.55±0.05  |
| BAM 22                                       | YGGFMRRVGRPFWWMDYQKRYG             | 7.4±1.5E-9                                   | 102±12                    | 0.51±0.09  | 2.5±1.1E-8             | 132±6                     | 1.11±0.10  |
| Peptide E                                    | YGGFMRRVGRPFWWMDYQKRYGGFL          | 2.1±1.5E-9                                   | 97±5                      | 0.29±0.03  | 5.9±1.5E-10            | 94±6                      | 0.32±0.04  |
| Peptide F                                    | YGGFMKKMDELYPEVEEEEANGGEVLGKRYGGFM | 2.3±1.3E-7                                   | 114±23                    | 0.98±0.21  | 1.3±1.2E-6             | 74±4                      | 0.99±0.17  |

Analysis of data for [<sup>35</sup>S]GTP<sub>γ</sub>S binding and β-arrestin recruitment by endogenous opioid peptides at μOR (Supl. Fig. 1. and 3) fitted to the four parameter logistic equation in Prism 7.0.

β-neoend, β-neoendorphin; α-neoend, α-neoendorphin; Ac., Acetyl; BAM, Bovine adrenal medulla; Dyn, Dynorphin; end, endorphin; enk, enkephalin. n.d., not detectable.

**Supplemental Table 3. Four parameter logistic analysis for [<sup>35</sup>S]GTPγS binding and β-arrestin recruitment by endogenous opioid peptides at δOR**

| Ligand                                       | Sequence                            | [ <sup>35</sup> S]GTPγS binding |                           |            | β-arrestin recruitment |                           |            |
|----------------------------------------------|-------------------------------------|---------------------------------|---------------------------|------------|------------------------|---------------------------|------------|
|                                              |                                     | EC <sub>50</sub> [M]            | E <sub>max</sub> at 10 μM | Hill Slope | EC <sub>50</sub> [M]   | E <sub>max</sub> at 10 μM | Hill Slope |
| <b>Standard</b>                              |                                     |                                 |                           |            |                        |                           |            |
| Delt II                                      |                                     | 1.7±1.3E-8                      | 100±6                     | 0.44±0.04  | 6.2±1.2E-9             | 100±5                     | 0.49±0.03  |
| <b>Pro-dynorphin derived peptides</b>        |                                     |                                 |                           |            |                        |                           |            |
| β-neoend                                     | YGGFLRKYP                           | 1.1±1.7E-8                      | 25±6                      | 0.63±0.19  | 1.6±1.1E-7             | 70±4                      | 0.78±0.06  |
| α-neoend                                     | YGGFLRKYPK                          | 3.3±1.9E-9                      | 37±8                      | 0.38±0.08  | 2.9±1.1E-7             | 69±4                      | 0.71±0.07  |
| Dyn A8                                       | YGGFLRRI                            | 1.4±1.3E-8                      | 59±2                      | 0.65±0.09  | 3.3±1.1E-7             | 114±6                     | 0.82±0.05  |
| Dyn A13                                      | YGGFLRRIRPKLK                       | 4.2±1.5E-9                      | 59±8                      | 0.55±0.18  | 5.1±1.1E-7             | 108±4                     | 1.30±0.09  |
| Dyn A17                                      | YGGFLRRIRPKLKWDNQ                   | 1.9±1.1E-7                      | 42±1                      | 1.58±0.22  | 4.6±1.0E-7             | 112±3                     | 1.29±0.07  |
| Dyn B13                                      | YGGFLRRQFKVVT                       | 2.4±1.4E-8                      | 54±5                      | 0.75±0.18  | 4.8±1.1E-7             | 107±4                     | 1.14±0.08  |
| <b>Pro-opiomelanocortin derived peptides</b> |                                     |                                 |                           |            |                        |                           |            |
| Ac.β-end 26                                  | Ac-YGGFMTSEKSQTPLVTLFKNAIIKNA       | n.d.                            | 10±7                      | n.d.       | n.d.                   | 5±6                       | n.d.       |
| β-end 26                                     | YGGFMTSEKSQTPLVTLFKNAIIKNA          | 4.8±1.2E-8                      | 60±8                      | 1.15±0.26  | 4.4±1.1E-7             | 110±5                     | 1.05±0.07  |
| β-end 27                                     | YGGFMTSEKSQTPLVTLFKNAIIKNAY         | 6.1±1.1E-8                      | 74±2                      | 1.08±0.16  | 5.4±1.1E-7             | 109±3                     | 0.96±0.05  |
| β-end 31                                     | YGGFMTSEKSQTPLVTLFKNAIIKNAYKKGE     | 2.6±1.7E-8                      | 33±9                      | 0.77±0.29  | 1.8±1.1E-7             | 91±4                      | 1.10±0.08  |
| Des-Tyr-γ-end                                | GGFMTSEKSQTPLVTL                    | 1.3±1.3E-9                      | 18±1                      | 0.18±0.07  | n.d.                   | n.d.                      | n.d.       |
| γ-end                                        | YGGFMTSEKSQTPLVTL                   | 4.0±1.3E-8                      | 68±7                      | 0.60±0.10  | 4.6±1.0E-7             | 126±3                     | 0.90±0.04  |
| <b>Pro-enkephalin derived peptides</b>       |                                     |                                 |                           |            |                        |                           |            |
| Leu-enk                                      | YGGFL                               | 1.8±1.3E-8                      | 76±4                      | 1.21±0.29  | 7.6±1.2E-9             | 98±5                      | 0.79±0.10  |
| Met-enk                                      | YGGFM                               | 2.8±1.4E-8                      | 61±6                      | 0.72±0.17  | 5.3±1.1E-8             | 106±5                     | 0.79±0.08  |
| Met-enk RF                                   | YGGFMRF                             | 5.9±1.5E-9                      | 45±6                      | 0.58±0.11  | 3.1±1.1E-8             | 96±3                      | 0.76±0.07  |
| Met-enk RGL                                  | YGGFMRGL                            | 8.7±1.4E-10                     | 40±1                      | 0.86±0.24  | 3.7±1.1E-8             | 99±7                      | 0.93±0.11  |
| Metorphamide                                 | YGGFMRRV-NH <sub>2</sub>            | 6.3±1.5E-9                      | 41±7                      | 1.14±0.40  | 1.4±1.1E-7             | 92±2                      | 0.81±0.05  |
| BAM 12                                       | YGGFMRRVGRPF                        | 2.3±1.3E-8                      | 82±2                      | 0.59±0.10  | 2.5±1.2E-8             | 55±4                      | 1.02±0.21  |
| BAM 18                                       | YGGFMRRVGRPFWMDYQ                   | 1.3±1.5E-9                      | 67±3                      | 0.37±0.05  | 1.7±1.2E-8             | 69±3                      | 0.74±0.08  |
| BAM 22                                       | YGGFMRRVGRPFWMDYQKRYG               | 6.0±1.6E-9                      | 85±10                     | 0.33±0.05  | 3.2±1.1E-8             | 109±7                     | 0.93±0.11  |
| Peptide E                                    | YGGFMRRVGRPFWMDYQKRYGGFL            | 2.1±1.3E-8                      | 57±4                      | 0.76±0.15  | 1.1±1.2E-7             | 105±2                     | 0.54±0.04  |
| Peptide F                                    | YGGFMKKMDELYPLEVEEEEANGGEVLGKRYGGFM | 1.4±1.4E-7                      | 77±6                      | 0.41±0.07  | 2.6±1.3E-7             | 44±5                      | 0.49±0.06  |

Analysis of data for [<sup>35</sup>S]GTPγS binding and β-arrestin recruitment by endogenous opioid peptides at δOR (Supl.Fig.1 and 3) fitted to the four parameter logistic equation in Prism 7.0.

β-neoend, β-neoendorphin; α-neoend, α-neoendorphin; Ac., Acetyl; BAM, Bovine adrenal medulla; Dyn, Dynorphin; end, endorphin; enk, enkephalin. n.d., not detectable.

**Supplemental Table 4. Four parameter logistic analysis for [<sup>35</sup>S]GTP $\gamma$ S binding and  $\beta$ -arrestin recruitment by endogenous opioid peptides at  $\kappa$ OR**

| Ligand                                       | Sequence                               | <sup>35</sup> S]GTP $\gamma$ S binding |                                |                 | $\beta$ -arrestin recruitment |                                |                 |
|----------------------------------------------|----------------------------------------|----------------------------------------|--------------------------------|-----------------|-------------------------------|--------------------------------|-----------------|
|                                              |                                        | EC <sub>50</sub> [M]                   | E <sub>max</sub> at 10 $\mu$ M | Hill Slope      | EC <sub>50</sub> [M]          | E <sub>max</sub> at 10 $\mu$ M | Hill Slope      |
| <b>Standard</b>                              |                                        |                                        |                                |                 |                               |                                |                 |
| U69,593                                      |                                        | 3.8 $\pm$ 1.3E-9                       | 100 $\pm$ 4                    | 0.73 $\pm$ 0.10 | 3.0 $\pm$ 1.1E-7              | 100 $\pm$ 6                    | 0.80 $\pm$ 0.06 |
| <b>Pro-dynorphin derived peptides</b>        |                                        |                                        |                                |                 |                               |                                |                 |
| $\beta$ -neoend                              | YGGFLRKYP                              | 1.8 $\pm$ 1.5E-8                       | 106 $\pm$ 11                   | 0.51 $\pm$ 0.10 | 1.6 $\pm$ 1.2E-7              | 55 $\pm$ 4                     | 1.27 $\pm$ 0.20 |
| $\alpha$ -neoend                             | YGGFLRKYPK                             | 5.0 $\pm$ 1.7E-9                       | 81 $\pm$ 12                    | 0.27 $\pm$ 0.04 | 5.8 $\pm$ 1.5E-9              | 48 $\pm$ 3                     | 0.36 $\pm$ 0.05 |
| Dyn A8                                       | YGGFLRRI                               | 4.1 $\pm$ 1.3E-9                       | 101 $\pm$ 4                    | 0.45 $\pm$ 0.05 | 1.1 $\pm$ 1.1E-7              | 113 $\pm$ 4                    | 1.14 $\pm$ 0.07 |
| Dyn A13                                      | YGGFLRRIRPKLK                          | 3.3 $\pm$ 1.7E-10                      | 66 $\pm$ 10                    | 0.34 $\pm$ 0.06 | 5.7 $\pm$ 1.2E-9              | 105 $\pm$ 4                    | 0.77 $\pm$ 0.08 |
| Dyn A17                                      | YGGFLRRIRPKLKWDNQ                      | 4.6 $\pm$ 1.3E-9                       | 100 $\pm$ 2                    | 0.93 $\pm$ 0.71 | 1.0 $\pm$ 1.1E-7              | 86 $\pm$ 3                     | 0.97 $\pm$ 0.10 |
| Dyn B13                                      | YGGFLRRQFKVVT                          | 1.4 $\pm$ 1.3E-8                       | 98 $\pm$ 11                    | 0.50 $\pm$ 0.06 | 1.4 $\pm$ 1.2E-7              | 49 $\pm$ 1                     | 0.56 $\pm$ 0.07 |
| <b>Pro-opiomelanocortin derived peptides</b> |                                        |                                        |                                |                 |                               |                                |                 |
| Ac. $\beta$ -end 26                          | Ac-YGGFMTSEKSQTPLVTLFKNAIIKNA          | 2.0 $\pm$ 1.7E-7                       | 53 $\pm$ 11                    | 0.65 $\pm$ 0.23 | n.d.                          | n.d.                           | n.d.            |
| $\beta$ -end 26                              | YGGFMTSEKSQTPLVTLFKNAIIKNA             | 2.6 $\pm$ 1.6E-8                       | 103 $\pm$ 5                    | 0.41 $\pm$ 0.08 | 1.6 $\pm$ 1.3E-6              | 33 $\pm$ 4                     | 2.13 $\pm$ 0.95 |
| $\beta$ -end 27                              | YGGFMTSEKSQTPLVTLFKNAIIKNAY            | 3.9 $\pm$ 1.4E-8                       | 90 $\pm$ 5                     | 0.78 $\pm$ 0.21 | 4.6 $\pm$ 1.5E-6              | 35 $\pm$ 3                     | 2.46 $\pm$ 1.14 |
| $\beta$ -end 31                              | YGGFMTSEKSQTPLVTLFKNAIIKNAYKKGE        | 2.0 $\pm$ 1.6E-8                       | 68 $\pm$ 13                    | 0.98 $\pm$ 0.40 | 1.3 $\pm$ 1.4E-6              | 21 $\pm$ 2                     | 2.64 $\pm$ 1.96 |
| Des-Tyr- $\gamma$ -end                       | GGFMTSEKSQTPLVTL                       | n.d.                                   | 6 $\pm$ 5                      | n.d.            | n.d.                          | 7 $\pm$ 2                      | n.d.            |
| $\gamma$ -end                                | YGGFMTSEKSQTPLVTL                      | 8.2 $\pm$ 1.5E-8                       | 98 $\pm$ 13                    | 0.48 $\pm$ 0.10 | 2.0 $\pm$ 1.9E-6              | 21 $\pm$ 1                     | 2.41 $\pm$ 2.02 |
| <b>Pro-enkephalin derived peptides</b>       |                                        |                                        |                                |                 |                               |                                |                 |
| Leu-enk                                      | YGGFL                                  | 3.6 $\pm$ 1.4E-7                       | 64 $\pm$ 4                     | 0.60 $\pm$ 0.12 | n.d.                          | 8 $\pm$ 1                      | n.d.            |
| Met-enk                                      | YGGFM                                  | 1.0 $\pm$ 1.3E-7                       | 53 $\pm$ 4                     | 0.38 $\pm$ 0.05 | 2.2 $\pm$ 3.4E-6              | 13 $\pm$ 3                     | 2.90 $\pm$ 4.31 |
| Met-enk RF                                   | YGGFMRF                                | 1.4 $\pm$ 1.3E-8                       | 54 $\pm$ 6                     | 1.47 $\pm$ 0.46 | 8.3 $\pm$ 1.1E-7              | 41 $\pm$ 2                     | 1.18 $\pm$ 0.21 |
| Met-enk RGL                                  | YGGFMRGL                               | 6.0 $\pm$ 1.2E-8                       | 75 $\pm$ 8                     | 0.85 $\pm$ 0.15 | 1.5 $\pm$ 1.3E-6              | 18 $\pm$ 1                     | 0.72 $\pm$ 0.15 |
| Metorphamide                                 | YGGFMRRV-NH <sub>2</sub>               | 9.3 $\pm$ 1.5E-10                      | 27 $\pm$ 6                     | 0.35 $\pm$ 0.12 | 6.3 $\pm$ 1.2E-8              | 78 $\pm$ 9                     | 0.89 $\pm$ 0.14 |
| BAM 12                                       | YGGFMRRVGRPF                           | 2.3 $\pm$ 1.7E-8                       | 65 $\pm$ 6                     | 0.49 $\pm$ 0.12 | 8.0 $\pm$ 1.1E-7              | 100 $\pm$ 8                    | 2.62 $\pm$ 0.39 |
| BAM 18                                       | YGGFMRRVGRPFWWMDYQ                     | 7.9 $\pm$ 1.1E-9                       | 127 $\pm$ 2                    | 0.76 $\pm$ 0.04 | 1.7 $\pm$ 1.2E-7              | 68 $\pm$ 8                     | 0.97 $\pm$ 0.14 |
| BAM 22                                       | YGGFMRRVGRPFWWMDYQKRYG                 | 1.7 $\pm$ 1.3E-8                       | 133 $\pm$ 3                    | 0.50 $\pm$ 0.07 | 1.4 $\pm$ 1.1E-7              | 96 $\pm$ 5                     | 0.84 $\pm$ 0.07 |
| Peptide E                                    | YGGFMRRVGRPFWWMDYQKRYGGFL              | 2.3 $\pm$ 1.5E-9                       | 55 $\pm$ 9                     | 0.62 $\pm$ 0.12 | 7.7 $\pm$ 1.2E-8              | 98 $\pm$ 6                     | 0.40 $\pm$ 0.04 |
| Peptide F                                    | YGGFMKKMDELYPEVEEEEANGGEVLGK<br>RYGGFM | 6.7 $\pm$ 1.7E-7                       | 48 $\pm$ 15                    | 0.89 $\pm$ 0.45 | 8.4 $\pm$ 1.4E-7              | 9 $\pm$ 2                      | 2.83 $\pm$ 3.04 |

Analysis of data for [<sup>35</sup>S]GTP $\gamma$ S binding and  $\beta$ -arrestin recruitment by endogenous opioid peptides at  $\kappa$ OR (Supl Fig.1 and 3) fitted to the four parameter logistic equation in Prism 7.0.

$\beta$ -neoend,  $\beta$ -neoendorphin;  $\alpha$ -neoend,  $\alpha$ -neoendorphin; Ac., Acetyl; BAM, Bovine adrenal medulla; Dyn, Dynorphin; end, endorphin; enk, enkephalin. n.d., not detectable.



**Supplemental Table 5. cAMP inhibition by endogenous opioid peptides in CHO cells expressing Flag-tagged opioid receptors**

| Ligand                                       | cAMP inhibition      |                            |                      |                            |                      |                            |
|----------------------------------------------|----------------------|----------------------------|----------------------|----------------------------|----------------------|----------------------------|
|                                              | CHO-Flag $\mu$ OR    |                            | CHO-Flag $\delta$ OR |                            | CHO-Flag $\kappa$ OR |                            |
|                                              | EC <sub>50</sub> [M] | % inhibition at 10 $\mu$ M | EC <sub>50</sub> [M] | % inhibition at 10 $\mu$ M | EC <sub>50</sub> [M] | % inhibition at 10 $\mu$ M |
| <b>Standard</b>                              |                      |                            |                      |                            |                      |                            |
| DAMGO                                        | 6.8 $\pm$ 1.3E-9     | 100 $\pm$ 2                |                      |                            |                      |                            |
| Delt II                                      |                      |                            | 1.9 $\pm$ 1.6E-8     | 100 $\pm$ 6                |                      |                            |
| U69,593                                      |                      |                            |                      |                            | 4.9 $\pm$ 1.3E-10    | 100 $\pm$ 8                |
| <b>Pro-dynorphin derived peptides</b>        |                      |                            |                      |                            |                      |                            |
| Dyn A8                                       | 4.8 $\pm$ 1.2E-9     | 76 $\pm$ 1**               | 1.4 $\pm$ 1.6E-10    | 67 $\pm$ 3****             | 5.7 $\pm$ 1.2E-9     | 144 $\pm$ 3***             |
| Dyn A13                                      | 6.9 $\pm$ 1.3E-9     | 88 $\pm$ 1                 | 2.0 $\pm$ 1.4E-10    | 84 $\pm$ 6*                | 8.8 $\pm$ 1.2E-10    | 147 $\pm$ 3****            |
| Dyn A17                                      | 1.3 $\pm$ 1.2E-9     | 95 $\pm$ 11                | 9.2 $\pm$ 1.6E-10    | 96 $\pm$ 8                 | 1.0 $\pm$ 1.2E-9     | 145 $\pm$ 10***            |
| Dyn B13                                      | 7.5 $\pm$ 1.5E-10    | 116 $\pm$ 10               | 5.5 $\pm$ 2.0E-10    | 54 $\pm$ 7****             | 2.1 $\pm$ 1.3E-9     | 99 $\pm$ 4                 |
| <b>Pro-opiomelanocortin derived peptides</b> |                      |                            |                      |                            |                      |                            |
| $\beta$ -end 26                              | 2.7 $\pm$ 1.4E-8     | 75 $\pm$ 3**               | 1.9 $\pm$ 1.3E-8     | 66 $\pm$ 4****             | 3.1 $\pm$ 1.6E-9     | 73 $\pm$ 10*               |
| $\beta$ -end 27                              | 6.3 $\pm$ 1.5E-9     | 70 $\pm$ 1**               | 2.8 $\pm$ 1.3E-8     | 59 $\pm$ 3****             | 3.7 $\pm$ 2.1E-9     | 69 $\pm$ 6 **              |
| $\beta$ -end 31                              | 7.8 $\pm$ 1.4E-9     | 107 $\pm$ 9                | 6.0 $\pm$ 1.3E-9     | 70 $\pm$ 3***              | 5.9 $\pm$ 1.5E-9     | 92 $\pm$ 12                |

Analysis of data for inhibition of cAMP levels in Fig.1, 2 and 3. Data is normalized to that of standards: DAMGO, Delt II, or U69,593. end, endorphin. \*p<0.05; \*\*p<0.01;\*\*\*p<0.001; \*\*\*\*p<0.0001; One-way ANOVA

**Supplemental Table 6. Bias Analysis for endogenous opioid peptides at  $\mu$ OR**

|                                              | GTP<br>Log RA       | $\beta$ -arrestin Log<br>RA | $\Delta$ log RA for<br>GTP<br>(DAMGO) | $\Delta$ log RA for $\beta$ -<br>arrestin<br>(DAMGO) | $\Delta \Delta$ log RA<br>(GTP –<br>$\beta$ arr) | Bias<br>Factor<br>(GTP –<br>$\beta$ arr) | Bias<br>Factor<br>( $\beta$ arr-<br>GTP) |
|----------------------------------------------|---------------------|-----------------------------|---------------------------------------|------------------------------------------------------|--------------------------------------------------|------------------------------------------|------------------------------------------|
| <b>Standard</b>                              |                     |                             |                                       |                                                      |                                                  |                                          |                                          |
| DAMGO                                        | 7.878 $\pm$ 0.09942 | 6.566 $\pm$ 0.05345         | 0.000 $\pm$ 0.141                     | 0.000 $\pm$ 0.076                                    | 0.000 $\pm$ 0.160                                | 1                                        |                                          |
| <b>Pro-dynorphin derived peptides</b>        |                     |                             |                                       |                                                      |                                                  |                                          |                                          |
| $\beta$ -neoend                              | 7.147 $\pm$ 0.1008  | 5.700 $\pm$ 0.06622         | -0.731 $\pm$ 0.142                    | -0.866 $\pm$ 0.085                                   | 0.135 $\pm$ 0.165                                | 1.365                                    |                                          |
| $\alpha$ -neoend                             | 7.447 $\pm$ 0.1760  | 5.674 $\pm$ 0.07533         | -0.431 $\pm$ 0.202                    | -0.892 $\pm$ 0.092                                   | 0.461 $\pm$ 0.222                                | 2.891                                    |                                          |
| Dyn A8                                       | 8.072 $\pm$ 0.1706  | 6.281 $\pm$ 0.05310         | 0.194 $\pm$ 0.197                     | -0.285 $\pm$ 0.075                                   | 0.479 $\pm$ 0.211                                | 3.013                                    |                                          |
| Dyn A13                                      | 7.562 $\pm$ 0.1490  | 6.193 $\pm$ 0.05301         | -0.316 $\pm$ 0.179                    | -0.373 $\pm$ 0.075                                   | 0.057 $\pm$ 0.194                                | 1.140                                    |                                          |
| Dyn A17                                      | 6.838 $\pm$ 0.09630 | 5.535 $\pm$ 0.06391         | -1.040 $\pm$ 0.193                    | -1.031 $\pm$ 0.083                                   | -0.009 $\pm$ 0.162                               |                                          | 1.021                                    |
| Dyn B13                                      | 7.314 $\pm$ 0.1655  | 5.041 $\pm$ 0.07307         | -0.564 $\pm$ 0.193                    | -1.525 $\pm$ 0.091                                   | 0.962 $\pm$ 0.213                                | 9.141                                    |                                          |
| <b>Pro-opiomelanocortin derived peptides</b> |                     |                             |                                       |                                                      |                                                  |                                          |                                          |
| $\beta$ -end 26                              | 6.938 $\pm$ 0.09504 | 5.752 $\pm$ 0.06070         | -0.94 $\pm$ 0.138                     | -0.814 $\pm$ 0.081                                   | -0.126 $\pm$ 0.160                               |                                          | 1.337                                    |
| $\beta$ -end 27                              | 7.155 $\pm$ 0.09187 | 6.180 $\pm$ 0.05338         | -0.723 $\pm$ 0.135                    | -0.386 $\pm$ 0.076                                   | -0.337 $\pm$ 0.155                               |                                          | 2.173                                    |
| $\beta$ -end 31                              | 7.306 $\pm$ 0.08552 | 5.356 $\pm$ 0.09037         | -0.572 $\pm$ 0.131                    | -1.210 $\pm$ 0.105                                   | 0.638 $\pm$ 0.168                                | 4.345                                    |                                          |
| $\gamma$ -end                                | 7.066 $\pm$ 0.08313 | 6.377 $\pm$ 0.05131         | -0.812 $\pm$ 0.130                    | -0.189 $\pm$ 0.074                                   | -0.623 $\pm$ 0.149                               |                                          | 4.198                                    |
| <b>Pro-enkephalin derived peptides</b>       |                     |                             |                                       |                                                      |                                                  |                                          |                                          |
| Leu-enk                                      | 7.827 $\pm$ 0.1445  | 5.517 $\pm$ 0.06727         | -0.051 $\pm$ 0.175                    | -1.049 $\pm$ 0.086                                   | 0.998 $\pm$ 0.195                                | 9.954                                    |                                          |
| Met-enk                                      | 7.098 $\pm$ 0.09254 | 5.339 $\pm$ 0.07151         | -0.780 $\pm$ 0.136                    | -1.227 $\pm$ 0.089                                   | 0.447 $\pm$ 0.163                                | 2.799                                    |                                          |
| Met-enk RF                                   | 8.851 $\pm$ 0.1888  | 5.587 $\pm$ 0.06224         | 0.973 $\pm$ 0.213                     | -0.979 $\pm$ 0.062                                   | 1.952 $\pm$ 0.229                                | 89.537                                   |                                          |
| Met-enk RGL                                  | 7.812 $\pm$ 0.1040  | 5.412 $\pm$ 0.06845         | -0.066 $\pm$ 0.144                    | -1.154 $\pm$ 0.087                                   | 1.088 $\pm$ 0.168                                | 12.246                                   |                                          |
| Metorphamide                                 | 9.068 $\pm$ 0.2590  | 6.551 $\pm$ 0.05676         | 1.190 $\pm$ 0.277                     | -0.015 $\pm$ 0.078                                   | 1.205 $\pm$ 0.288                                | 16.032                                   |                                          |
| BAM 12                                       | 7.994 $\pm$ 0.1082  | 6.896 $\pm$ 0.05303         | 0.116 $\pm$ 0.147                     | 0.330 $\pm$ 0.075                                    | -0.214 $\pm$ 0.165                               |                                          | 1.637                                    |
| BAM 18                                       | 7.927 $\pm$ 0.1416  | 7.403 $\pm$ 0.05919         | 0.049 $\pm$ 0.173                     | 0.837 $\pm$ 0.080                                    | -0.788 $\pm$ 0.191                               |                                          | 6.138                                    |
| BAM 22                                       | 8.479 $\pm$ 0.1400  | 7.848 $\pm$ 0.05875         | 0.601 $\pm$ 0.172                     | 1.282 $\pm$ 0.079                                    | -0.681 $\pm$ 0.189                               |                                          | 4.797                                    |
| Peptide E                                    | 8.128 $\pm$ 0.1646  | 7.193 $\pm$ 0.07454         | 0.250 $\pm$ 0.192                     | 0.627 $\pm$ 0.092                                    | -0.377 $\pm$ 0.213                               |                                          | 2.382                                    |
| Peptide F                                    | 6.591 $\pm$ 0.1147  | 5.579 $\pm$ 0.07094         | -1.287 $\pm$ 0.152                    | -0.987 $\pm$ 0.089                                   | -0.300 $\pm$ 0.176                               |                                          | 1.995                                    |

Bias analysis was carried out as described in Methods. RA=  $\tau/K_A$

**Supplemental Table 7. Bias Analysis for endogenous opioid peptides at  $\delta$ OR**

|                                              | GTP<br>Log RA*      | $\beta$ -arrestin Log<br>RA* | $\Delta$ log RA for<br>GTP<br>(DAMGO) | $\Delta$ log RA for $\beta$ -<br>arrestin<br>(DAMGO) | $\Delta \Delta$ log RA<br>(GTP - $\beta$ arr) | Bias<br>Factor<br>(GTP -<br>$\beta$ arr) | Bias<br>Factor<br>( $\beta$ arr-<br>GTP) |
|----------------------------------------------|---------------------|------------------------------|---------------------------------------|------------------------------------------------------|-----------------------------------------------|------------------------------------------|------------------------------------------|
| <b>Standard</b>                              |                     |                              |                                       |                                                      |                                               |                                          |                                          |
| Delt II                                      | 8.056 $\pm$ 0.2085  | 7.890 $\pm$ 0.05763          | 0.000 $\pm$ 0.295                     | 0.000 $\pm$ 0.082                                    | 0.000 $\pm$ .306                              | 1.00                                     |                                          |
| <b>Pro-dynorphin derived peptides</b>        |                     |                              |                                       |                                                      |                                               |                                          |                                          |
| $\beta$ -neoend                              | 7.147 $\pm$ 0.1008  | 5.700 $\pm$ 0.06622          | -0.731 $\pm$ 0.142                    | -0.866 $\pm$ 0.085                                   | 0.135 $\pm$ 0.165                             | 1.365                                    |                                          |
| $\alpha$ -neoend                             | 7.447 $\pm$ 0.1760  | 5.674 $\pm$ 0.07533          | -0.431 $\pm$ 0.202                    | -0.892 $\pm$ 0.092                                   | 0.461 $\pm$ 0.222                             | 2.891                                    |                                          |
| Dyn A8                                       | 8.072 $\pm$ 0.1706  | 6.281 $\pm$ 0.05310          | 0.194 $\pm$ 0.197                     | -0.285 $\pm$ 0.075                                   | 0.479 $\pm$ 0.211                             | 3.013                                    |                                          |
| Dyn A13                                      | 7.562 $\pm$ 0.1490  | 6.193 $\pm$ 0.05301          | -0.316 $\pm$ 0.179                    | -0.373 $\pm$ 0.075                                   | 0.057 $\pm$ 0.194                             | 1.140                                    |                                          |
| Dyn A17                                      | 6.838 $\pm$ 0.09630 | 5.535 $\pm$ 0.06391          | -1.040 $\pm$ 0.193                    | -1.031 $\pm$ 0.083                                   | -0.009 $\pm$ 0.162                            |                                          | 1.021                                    |
| Dyn B13                                      | 7.314 $\pm$ 0.1655  | 5.041 $\pm$ 0.07307          | -0.564 $\pm$ 0.193                    | -1.525 $\pm$ 0.091                                   | 0.962 $\pm$ 0.213                             | 9.141                                    |                                          |
| <b>Pro-opiomelanocortin derived peptides</b> |                     |                              |                                       |                                                      |                                               |                                          |                                          |
| $\beta$ -end 26                              | 6.476 $\pm$ 0.1871  | 6.387 $\pm$ 0.04864          | -1.580 $\pm$ 0.280                    | -1.503 $\pm$ 0.075                                   | -0.077 $\pm$ 0.290                            |                                          | 1.194                                    |
| $\beta$ -end 27                              | 7.106 $\pm$ 0.1894  | 6.296 $\pm$ 0.05637          | -0.949 $\pm$ 0.282                    | -1.594 $\pm$ 0.081                                   | 0.645 $\pm$ 0.293                             | 4.416                                    |                                          |
| $\beta$ -end 31                              | 5.773 $\pm$ 0.2159  | 6.699 $\pm$ 0.04868          | -2.283 $\pm$ 0.300                    | -1.191 $\pm$ 0.075                                   | -1.092 $\pm$ 0.309                            |                                          | 12.359                                   |
| $\gamma$ -end                                | 7.475 $\pm$ 0.1836  | 6.782 $\pm$ 0.04557          | -0.581 $\pm$ 0.278                    | -1.108 $\pm$ 0.073                                   | 0.527 $\pm$ 0.287                             | 3.365                                    |                                          |
| <b>Pro-enkephalin derived peptides</b>       |                     |                              |                                       |                                                      |                                               |                                          |                                          |
| Leu-enk                                      | 7.588 $\pm$ 0.1972  | 7.970 $\pm$ 0.05895          | -0.468 $\pm$ 0.287                    | 0.80 $\pm$ 0.082                                     | -0.548 $\pm$ 0.299                            |                                          | 3.532                                    |
| Met-enk                                      | 6.564 $\pm$ 0.1869  | 7.279 $\pm$ 0.04663          | -1.492 $\pm$ 0.280                    | -0.611 $\pm$ 0.074                                   | -0.881 $\pm$ 0.290                            |                                          | 7.603                                    |
| Met-enk RF                                   | 5.984 $\pm$ 0.1921  | 7.337 $\pm$ 0.04690          | -2.072 $\pm$ 0.284                    | -0.553 $\pm$ 0.074                                   | -1.519 $\pm$ 0.293                            |                                          | 33.037                                   |
| Met-enk RGL                                  | 6.501 $\pm$ 0.1871  | 7.329 $\pm$ 0.04759          | -1.555 $\pm$ 0.280                    | -0.561 $\pm$ 0.075                                   | -0.994 $\pm$ 0.290                            |                                          | 9.863                                    |
| Metorphamide                                 | 6.584 $\pm$ 0.1851  | 6.779 $\pm$ 0.04514          | -1.472 $\pm$ 0.279                    | -1.111 $\pm$ 0.073                                   | -0.361 $\pm$ 0.288                            |                                          | 2.296                                    |
| BAM 12                                       | 8.115 $\pm$ 0.2004  | 6.386 $\pm$ 0.04887          | 0.059 $\pm$ 0.289                     | -1.504 $\pm$ 0.076                                   | 1.563 $\pm$ 0.299                             | 36.559                                   |                                          |
| BAM 18                                       | 7.679 $\pm$ 0.1877  | 7.115 $\pm$ 0.04400          | -0.377 $\pm$ 0.281                    | -0.775 $\pm$ 0.073                                   | 0.398 $\pm$ 0.290                             | 2.500                                    |                                          |
| BAM 22                                       | 7.943 $\pm$ 0.1949  | 7.589 $\pm$ 0.04843          | -0.113 $\pm$ 0.285                    | -0.301 $\pm$ 0.075                                   | 0.188 $\pm$ 0.295                             | 1.542                                    |                                          |
| Peptide E                                    | 6.734 $\pm$ 0.1825  | 7.020 $\pm$ 0.04438          | -1.322 $\pm$ 0.277                    | -0.870 $\pm$ 0.073                                   | -0.452 $\pm$ 0.286                            |                                          | 2.831                                    |
| Peptide F                                    | 6.698 $\pm$ 0.1830  | 5.812 $\pm$ 0.06696          | -1.358 $\pm$ 0.277                    | -2.078 $\pm$ 0.088                                   | 0.720 $\pm$ 0.291                             | 5.248                                    |                                          |

Bias analysis was carried out as described in Methods. RA=  $\tau/K_A$

**Supplemental Table 8. Bias Analysis for endogenous opioid peptides at  $\kappa$ OR**

|                                              | GTP<br>Log RA      | $\beta$ -arrestin Log<br>RA | $\Delta$ log RA for<br>GTP<br>(DAMGO) | $\Delta$ log RA for<br>$\beta$ -arrestin<br>(DAMGO) | $\Delta \Delta$ log RA<br>(GTP – $\beta$ arr) | Bias<br>Factor<br>(GTP –<br>$\beta$ arr) | Bias<br>Factor<br>( $\beta$ arr-<br>GTP) |
|----------------------------------------------|--------------------|-----------------------------|---------------------------------------|-----------------------------------------------------|-----------------------------------------------|------------------------------------------|------------------------------------------|
| <b>Standard</b>                              |                    |                             |                                       |                                                     |                                               |                                          |                                          |
| U69,593                                      | 7.36 $\pm$ 0.574   | 6.302 $\pm$ 0.06124         | 0.000 $\pm$ 0.812                     | 0.000 $\pm$ 0.087                                   | 0 $\pm$ .816                                  | 1.000                                    |                                          |
| <b>Pro-dynorphin derived peptides</b>        |                    |                             |                                       |                                                     |                                               |                                          |                                          |
| $\beta$ -neoend                              | 7.169 $\pm$ 0.5155 | 5.900 $\pm$ 0.07049         | -0.191 $\pm$ 0.772                    | -0.402 $\pm$ 0.093                                  | 0.211 $\pm$ 0.777                             | 1.626                                    |                                          |
| $\alpha$ -neoend                             | 6.461 $\pm$ 0.5048 | 5.792 $\pm$ 0.07036         | -0.899 $\pm$ 0.764                    | -0.510 $\pm$ 0.093                                  | -0.389 $\pm$ 0.770                            |                                          | 2.483                                    |
| Dyn A8                                       | 7.513 $\pm$ 0.5547 | 6.964 $\pm$ 0.05749         | 0.153 $\pm$ 0.798                     | 0.662 $\pm$ 0.084                                   | -0.509 $\pm$ 0.803                            |                                          | 3.177                                    |
| Dyn A13                                      | 6.237 $\pm$ 0.5215 | 8.243 $\pm$ 0.07183         | -1.123 $\pm$ 0.776                    | 1.941 $\pm$ 0.094                                   | -3.064 $\pm$ 0.781                            |                                          | 1158.777                                 |
| Dyn A17                                      | 7.283 $\pm$ 0.6806 | 6.536 $\pm$ 0.06153         | -0.077 $\pm$ 0.890                    | 0.234 $\pm$ 0.087                                   | -0.311 $\pm$ 0.895                            |                                          | 124.165                                  |
| Dyn B13                                      | 6.935 $\pm$ 0.5313 | 5.266 $\pm$ 0.07009         | -0.425 $\pm$ 0.782                    | -1.076 $\pm$ 0.093                                  | 0.651 $\pm$ 0.788                             | 4.477                                    |                                          |
| <b>Pro-opiomelanocortin derived peptides</b> |                    |                             |                                       |                                                     |                                               |                                          |                                          |
| $\beta$ -end 26                              | 6.784 $\pm$ 0.4554 | 4.289 $\pm$ 0.1126          | -0.576 $\pm$ 0.780                    | -2.013 $\pm$ 0.128                                  | 1.437 $\pm$ 0.790                             | 27.353                                   |                                          |
| $\beta$ -end 27                              | 6.314 $\pm$ 0.5215 | 4.214 $\pm$ 0.1225          | -1.046 $\pm$ 0.776                    | -2.088 $\pm$ 0.137                                  | 1.042 $\pm$ 0.788                             | 11.015                                   |                                          |
| $\beta$ -end 31                              | 5.872 $\pm$ 0.5194 | 4.318 $\pm$ 0.1753          | -1.488 $\pm$ 0.774                    | -1.984 $\pm$ 0.186                                  | 0.496 $\pm$ 0.796                             | 3.133                                    |                                          |
| $\gamma$ -end                                | 6.325 $\pm$ 0.5062 | 4.269 $\pm$ 0.1816          | -1.035 $\pm$ 0.765                    | -2.033 $\pm$ 0.192                                  | 0.998 $\pm$ 0.789                             | 9.954                                    |                                          |
| <b>Pro-enkephalin derived peptides</b>       |                    |                             |                                       |                                                     |                                               |                                          |                                          |
| Leu-enk                                      | 4.635 $\pm$ 0.5869 | 3.091 $\pm$ 0.4059          | -2.797 $\pm$ 0.821                    | -3.211 $\pm$ 0.410                                  | 0.414 $\pm$ 0.918                             | 2.594                                    |                                          |
| Met-enk                                      | 4.537 $\pm$ 0.5956 | 3.462 $\pm$ 0.2521          | -2.823 $\pm$ 0.827                    | -2.840 $\pm$ 0.259                                  | 0.017 $\pm$ 0.867                             | 1.040                                    |                                          |
| Met-enk RF                                   | 5.888 $\pm$ 0.5247 | 4.676 $\pm$ 0.1088          | -1.472 $\pm$ 0.778                    | -1.626 $\pm$ 0.125                                  | 0.154 $\pm$ 0.788                             | 1.426                                    |                                          |
| Met-enk RGL                                  | 5.802 $\pm$ 0.5264 | 3.816 $\pm$ 0.1726          | -1.558 $\pm$ 0.779                    | -2.486 $\pm$ 0.183                                  | 0.928 $\pm$ 0.800                             | 8.472                                    |                                          |
| Metorphamide                                 | 4.195 $\pm$ 0.6843 | 6.594 $\pm$ 0.05774         | -3.165 $\pm$ 0.893                    | 0.292 $\pm$ 0.084                                   | -3.457 $\pm$ 0.897                            |                                          | 3250.87                                  |
| BAM 12                                       | 6.722 $\pm$ 0.5058 | 6.029 $\pm$ 0.05245         | -0.588 $\pm$ 0.765                    | -0.273 $\pm$ 0.081                                  | -0.315 $\pm$ 0.769                            |                                          | 2.099                                    |
| BAM 18                                       | 8.310 $\pm$ 0.719  | 6.011 $\pm$ 0.06417         | 0.950 $\pm$ 0.920                     | -0.291 $\pm$ 0.089                                  | 1.263 $\pm$ 0.991                             | 17.418                                   |                                          |
| BAM 22                                       | 8.195 $\pm$ 0.5777 | 6.606 $\pm$ 0.05867         | 0.835 $\pm$ 0.814                     | 0.304 $\pm$ 0.085                                   | 0.551 $\pm$ 0.819                             | 3.396                                    |                                          |
| Peptide E                                    | 6.022 $\pm$ 0.5136 | 6.725 $\pm$ 0.06223         | -1.338 $\pm$ 0.770                    | 0.423 $\pm$ 0.087                                   | -1.761 $\pm$ 0.775                            |                                          | 59.979                                   |
| Peptide F                                    | 4.075 $\pm$ 0.7043 | 3.643 $\pm$ 0.3512          | -3.285 $\pm$ 0.909                    | -2.659 $\pm$ 0.356                                  | -0.626 $\pm$ 0.976                            |                                          | 4.977                                    |

Bias analysis was carried out as described in Methods. RA=  $\tau/K_A$
